# Supplementary material for: Returning-to-work after mental health-associated sick leave: a qualitative interview study exploring the experiences of general practitioners in Germany
Source: Springer Nature journal article supplement (doi:10.1186/s12875-023-02219-x), 2023-12-02
Supplement: MOESM1 [file 26485520]

## Interview guide

|     | Key question                                                                                                                         | Check questions                                                                                                                                                                                                                                                                                                                                                | Precise questions                                                                                                                                                                                                               | Maintenance/<br>control questions                                                                                                                            |
|-----|--------------------------------------------------------------------------------------------------------------------------------------|----------------------------------------------------------------------------------------------------------------------------------------------------------------------------------------------------------------------------------------------------------------------------------------------------------------------------------------------------------------|---------------------------------------------------------------------------------------------------------------------------------------------------------------------------------------------------------------------------------|--------------------------------------------------------------------------------------------------------------------------------------------------------------|
| I   | <b>Which experience do you personally have with working patients having MHDs?</b>                                                    | <p>How can the patients be characterized?</p> <p>Surroundings of your patients?</p> <p>Particularities in comparison to patients with somatic problems?</p> <p>Common or rather rare situation for you?</p>                                                                                                                                                    | <p>Which diseases/diagnoses do your patients have?</p> <p>To what extent play addictions a role?</p> <p>How would you describe your role with your patients with MHDs?</p>                                                      | <p>Can you tell me some more about that?</p> <p>Can you describe that a little further?</p> <p>Can you give an example to that?</p>                          |
| II  | <b>If you decide to give a patient with a MHD a sick leave, how do you proceed?</b>                                                  | <p>Describe the process when a patient with a MHD visits your practice!</p> <p>Do you face problems when writing a sick leave for a patient with a MHD, too?</p> <p>What else is important to the patient?</p> <p>How is your usual proceeding after writing the sick leave?</p> <p>How do you evaluate the right time for your patient to return to work?</p> | <p>Are there special approaches, e.g. tools or typical questions that you use which help you evaluate?</p> <p>Do you have a certain scheme for follow-up appointments?</p> <p>Are there goal agreements with your patients?</p> | <p>Can you describe your proceeding some more?</p> <p>Can you think of additional examples to that?</p> <p>Do you remember a certain case in particular?</p> |
| III | <b>What is important for patients with long term sick leave and/or with the need to go to a psychiatric clinic, in your opinion?</b> | <p>Do you see any differences when comparing them to patients with a short-term sick leave?</p> <p>What is your experience with RTW of those patients?</p>                                                                                                                                                                                                     | <p>How is your definition of a 'short-term' and a 'long-term' sick leave?</p> <p>Describe your first contact to a patient after his/her discharge from psychiatric clinic!</p>                                                  | <p>Can you give an example for that?</p>                                                                                                                     |
| IV  | <b>In your reckoning, what is important for a successful RTW?</b>                                                                    | <p>What can you tell about the circumstances at the workplace of your patients, how do they influence the patients' situation?</p> <p>How important are the different stakeholders usually engaged in a RTW process?</p>                                                                                                                                       | <p>Many would consider work as the root or the fuel to a MHD. Others would claim that work or RTW is a cruel part of the treatment of patients having a MHD. How do you feel about that?</p>                                    |                                                                                                                                                              |

|          |                                                                                            |                                                                                                                                                                                                                                                                                                                                                                                                                                                                                                            |                                                                                                                                                                                    |                                                                                                                                                             |
|----------|--------------------------------------------------------------------------------------------|------------------------------------------------------------------------------------------------------------------------------------------------------------------------------------------------------------------------------------------------------------------------------------------------------------------------------------------------------------------------------------------------------------------------------------------------------------------------------------------------------------|------------------------------------------------------------------------------------------------------------------------------------------------------------------------------------|-------------------------------------------------------------------------------------------------------------------------------------------------------------|
|          |                                                                                            | <p>How would you describe your level of integration with other stakeholders taking part in the RTW process?</p> <p>Social workers at the clinic, doctors at the clinic, outpatient psychiatrists and psychotherapists, health insurance, RTW managers, company doctors?</p> <p>Do you think there is potential for improvement at certain interfaces?</p> <p>How would you describe the role of the social surroundings?</p> <p>What would <b>you</b> wish for, to improve the process for <b>you</b>?</p> | <p>Which other factors do you consider as relevant for a successful RTW?</p> <p>What could be changed/has to change in your opinion to alleviate the RTW process?</p>              | <p>Are there any more factors?<br/>Can you name any other stakeholders who are important in your opinion?</p> <p>Do you have a certain example to that?</p> |
| <b>V</b> | <b>Is there anything you would like to add, did we miss a spot important to the issue?</b> |                                                                                                                                                                                                                                                                                                                                                                                                                                                                                                            | <p>Do you like to go in further detail about a specific point we mentioned before?</p> <p>Did I miss a spot completely which is crucial to you when speaking about this topic?</p> |                                                                                                                                                             |
